# Supplementary material for: Potential invasion of exotic ambrosia beetles Xyleborus glabratus and Euwallacea sp. in Mexico: A major threat for native and cultivated forest ecosystems
Source: PubMed Central journal article supplement (PMC6033885; doi:10.1038/s41598-018-28517-4), 2018-07-05
Supplement: 41598_2018_28517_MOESM1_ESM.pdf [file 41598_2018_28517_MOESM1_ESM.pdf]

## Supplementary Information

**Potential invasion of exotic ambrosia beetles *Xyleborus glabratus* and *Euwallacea* sp.  
in Mexico: A major threat for native and cultivated forest ecosystems**

Andrés Lira-Noriega<sup>1\*</sup>, Jorge Soberón<sup>2</sup>, Julián Equihua<sup>3</sup>

<sup>1</sup> CONACyT Research Fellow, Instituto de Ecología A. C., Red de Estudios Moleculares Avanzados, Carretera Antigua a Coatepec 351, El Haya, 91070 Xalapa, Veracruz, México.

<sup>2</sup> Biodiversity Institute, University of Kansas, Lawrence, KS 66045, USA.

<sup>3</sup> Comisión Nacional para el Conocimiento y Uso de la Biodiversidad, Liga Periférico - Insurgentes Sur 4903, Col. Parques del Pedregal, Delegación Tlalpan, 14010, México, D.F.

\* Corresponding author

E-mail: [aliranoriega@gmail.com](mailto:aliranoriega@gmail.com)

Work telephone number: +52(228) 842 1800 ext. 3602

Work fax number: +52(228) 818 780

**Supplementary Table S1. List of species used to generate ecological niche models.**

| Main species and SMCE layers                  | Number of occurrences |
|-----------------------------------------------|-----------------------|
| <i>Xyleborus glabratus</i>                    | 366                   |
| <i>Euwallacea</i> sp.                         | 504                   |
| <i>Xyleborus</i> sp.                          | 10117                 |
| Lauraceae sp.                                 | 8876                  |
| Hosts <i>Euwallacea</i> sp.                   | 27561                 |
| <b><i>Xyleborus</i> sp.</b>                   |                       |
| <i>Xyleborus affinis</i>                      | 89                    |
| <i>Xyleborus atratus</i>                      | 10                    |
| <i>Xyleborus californicus</i>                 | 14                    |
| <i>Xyleborus celsus</i>                       | 5                     |
| <i>Xyleborus declivis</i>                     | 6                     |
| <i>Xyleborus ferrugineus</i>                  | 68                    |
| <i>Xyleborus horridatus</i>                   | 4                     |
| <i>Xyleborus horridus</i>                     | 10                    |
| <i>Xyleborus imbellis</i>                     | 4                     |
| <i>Xyleborus intrusus</i>                     | 31                    |
| <i>Xyleborus macer</i>                        | 10                    |
| <i>Xyleborus posticus</i>                     | 16                    |
| <i>Xyleborus princeps</i>                     | 20                    |
| <i>Xyleborus pseudotenuis</i>                 | 5                     |
| <i>Xyleborus schedli</i>                      | 4                     |
| <i>Xyleborus schildi</i>                      | 4                     |
| <i>Xyleborus scopulorum</i>                   | 5                     |
| <i>Xyleborus sharpi</i>                       | 3                     |
| <i>Xyleborus spathipennis</i>                 | 18                    |
| <i>Xyleborus spinulosus</i>                   | 5                     |
| <i>Xyleborus swezeyi</i>                      | 4                     |
| <i>Xyleborus vespatorius</i>                  | 3                     |
| <i>Xyleborus volvulus</i>                     | 64                    |
| <i>Xyleborus xylographus</i>                  | 5                     |
| <b>Lauraceae &gt;15 occurrences in extent</b> |                       |
| <i>Aiouea inconspicua</i>                     | 23                    |
| <i>Beilschmiedia hondurensis</i>              | 23                    |
| <i>Beilschmiedia mexicana</i>                 | 48                    |
| <i>Beilschmiedia ovalis</i>                   | 38                    |
| <i>Beilschmiedia pendula</i>                  | 60                    |

|                                |     |
|--------------------------------|-----|
| <i>Beilschmiedia riparia</i>   | 25  |
| <i>Cassytha filiformis</i>     | 163 |
| <i>Cinnamomum areolatum</i>    | 15  |
| <i>Cinnamomum camphora</i>     | 25  |
| <i>Cinnamomum effusum</i>      | 54  |
| <i>Cinnamomum hartmannii</i>   | 53  |
| <i>Cinnamomum neurophyllum</i> | 44  |
| <i>Cinnamomum pachypodum</i>   | 90  |
| <i>Cinnamomum padiforme</i>    | 15  |
| <i>Cinnamomum salicifolium</i> | 32  |
| <i>Cinnamomum triplinerve</i>  | 235 |
| <i>Cinnamomum verum</i>        | 23  |
| <i>Licaria capitata</i>        | 77  |
| <i>Licaria cervantesii</i>     | 20  |
| <i>Licaria excelsa</i>         | 54  |
| <i>Licaria misantlae</i>       | 59  |
| <i>Licaria peckii</i>          | 72  |
| <i>Licaria triandra</i>        | 65  |
| <i>Lindera benzoin</i>         | 224 |
| <i>Litsea glaucescens</i>      | 467 |
| <i>Litsea muelleri</i>         | 22  |
| <i>Litsea neesiana</i>         | 18  |
| <i>Litsea pringlei</i>         | 17  |
| <i>Nectandra ambigens</i>      | 34  |
| <i>Nectandra cissiflora</i>    | 18  |
| <i>Nectandra coriacea</i>      | 145 |
| <i>Nectandra cuspidata</i>     | 73  |
| <i>Nectandra globosa</i>       | 33  |
| <i>Nectandra hihua</i>         | 121 |
| <i>Nectandra lineata</i>       | 106 |
| <i>Nectandra loesenerii</i>    | 28  |
| <i>Nectandra longicaudata</i>  | 52  |
| <i>Nectandra lundellii</i>     | 41  |
| <i>Nectandra martinicensis</i> | 93  |
| <i>Nectandra membranacea</i>   | 201 |
| <i>Nectandra nitida</i>        | 136 |
| <i>Nectandra purpurea</i>      | 62  |
| <i>Nectandra reticulata</i>    | 118 |
| <i>Nectandra salicifolia</i>   | 658 |
| <i>Nectandra salicina</i>      | 89  |
| <i>Nectandra sanguinea</i>     | 29  |

|                               |     |
|-------------------------------|-----|
| <i>Nectandra turbacensis</i>  | 65  |
| <i>Ocotea acuminatissima</i>  | 35  |
| <i>Ocotea betazensis</i>      | 21  |
| <i>Ocotea botrantha</i>       | 18  |
| <i>Ocotea bourgeauviana</i>   | 17  |
| <i>Ocotea cernua</i>          | 270 |
| <i>Ocotea dendrodaphne</i>    | 232 |
| <i>Ocotea effusa</i>          | 44  |
| <i>Ocotea helicterifolia</i>  | 156 |
| <i>Ocotea heydeana</i>        | 17  |
| <i>Ocotea klotzschiana</i>    | 42  |
| <i>Ocotea laetevirens</i>     | 167 |
| <i>Ocotea leucoxylon</i>      | 199 |
| <i>Ocotea macrophylla</i>     | 75  |
| <i>Ocotea oblonga</i>         | 29  |
| <i>Ocotea psychotrioides</i>  | 59  |
| <i>Ocotea puberula</i>        | 52  |
| <i>Ocotea purpurea</i>        | 46  |
| <i>Ocotea rovirosae</i>       | 15  |
| <i>Ocotea rubriflora</i>      | 31  |
| <i>Ocotea sinuata</i>         | 61  |
| <i>Ocotea sprucei</i>         | 20  |
| <i>Ocotea stenoneura</i>      | 44  |
| <i>Ocotea tampicensis</i>     | 32  |
| <i>Ocotea uxpanapana</i>      | 34  |
| <i>Ocotea vanderwerffii</i>   | 20  |
| <i>Ocotea veraguensis</i>     | 266 |
| <i>Ocotea verticillata</i>    | 15  |
| <i>Persea americana</i>       | 586 |
| <i>Persea borbonia</i>        | 26  |
| <i>Persea donnell-smithii</i> | 30  |
| <i>Persea hintonii</i>        | 27  |
| <i>Persea liebmannii</i>      | 84  |
| <i>Persea longipes</i>        | 19  |
| <i>Persea palustris</i>       | 32  |
| <i>Persea podadenia</i>       | 40  |
| <i>Persea purpusii</i>        | 21  |
| <i>Persea schiedeana</i>      | 117 |
| <i>Persea sprucei</i>         | 19  |
| <i>Persea vesticula</i>       | 39  |
| <i>Phoebe tampicensis</i>     | 25  |

|                                 |     |
|---------------------------------|-----|
| <i>Sassafras albidum</i>        | 270 |
| <i>Umbellularia californica</i> | 737 |

#### Lauraceae <15 occurrences in extent

|                                      |    |
|--------------------------------------|----|
| <i>Acroclididium glabrum</i>         | 2  |
| <i>Acroclididium lucidum</i>         | 2  |
| <i>Acroclididium misantlae</i>       | 1  |
| <i>Androglandula tennesseensis</i>   | 1  |
| <i>Beilschmiedia anay</i>            | 13 |
| <i>Beilschmiedia angustieliptica</i> | 2  |
| <i>Beilschmiedia manantlanensis</i>  | 7  |
| <i>Beilschmiedia ovalioides</i>      | 6  |
| <i>Beilschmiedia yaanica</i>         | 1  |
| <i>Cinnamomum acrodromum</i>         | 3  |
| <i>Cinnamomum amplexicaule</i>       | 3  |
| <i>Cinnamomum appelianum</i>         | 1  |
| <i>Cinnamomum arsenei</i>            | 4  |
| <i>Cinnamomum blumei</i>             | 2  |
| <i>Cinnamomum bractefoliaceum</i>    | 14 |
| <i>Cinnamomum breedlovii</i>         | 4  |
| <i>Cinnamomum cassia</i>             | 2  |
| <i>Cinnamomum chiapense</i>          | 3  |
| <i>Cinnamomum concinnum</i>          | 1  |
| <i>Cinnamomum dilleri</i>            | 10 |
| <i>Cinnamomum glossophyllum</i>      | 1  |
| <i>Cinnamomum grisebachii</i>        | 9  |
| <i>Cinnamomum leptophyllum</i>       | 1  |
| <i>Cinnamomum sleumeri</i>           | 3  |
| <i>Cinnamomum spectabile</i>         | 1  |
| <i>Cinnamomum spurium</i>            | 8  |
| <i>Cinnamomum validinerve</i>        | 1  |
| <i>Cinnamomum vanderwerffii</i>      | 1  |
| <i>Cinnamomum vanderwerffii</i>      | 1  |
| <i>Cinnamomum velveti</i>            | 2  |
| <i>Cinnamomum zapatae</i>            | 12 |
| <i>Cryptocarya praesamarensis</i>    | 1  |
| <i>Endiandra latifolia</i>           | 7  |
| <i>Laurinoxylon pulchrum</i>         | 1  |
| <i>Laurophyllum fremontensis</i>     | 2  |
| <i>Laurophyllum litseaefolia</i>     | 2  |
| <i>Laurus angusta</i>                | 2  |

|                               |    |
|-------------------------------|----|
| <i>Laurus californica</i>     | 1  |
| <i>Laurus cervantesii</i>     | 1  |
| <i>Laurus grandis</i>         | 1  |
| <i>Laurus ligi</i>            | 2  |
| <i>Laurus longipes</i>        | 1  |
| <i>Laurus machilus</i>        | 13 |
| <i>Laurus montana</i>         | 1  |
| <i>Laurus parvifolia</i>      | 2  |
| <i>Laurus perditia</i>        | 1  |
| <i>Laurus primigenia</i>      | 3  |
| <i>Laurus princeps</i>        | 1  |
| <i>Laurus tamala</i>          | 4  |
| <i>Licaria alata</i>          | 3  |
| <i>Licaria campechiana</i>    | 13 |
| <i>Licaria caudata</i>        | 9  |
| <i>Licaria chinanteca</i>     | 2  |
| <i>Licaria coriacea</i>       | 4  |
| <i>Licaria glaberrima</i>     | 1  |
| <i>Licaria guatemalensis</i>  | 6  |
| <i>Licaria ibarrae</i>        | 2  |
| <i>Licaria nayaritensis</i>   | 1  |
| <i>Licaria urceolata</i>      | 4  |
| <i>Licaria velutina</i>       | 7  |
| <i>Lindera angustifolia</i>   | 1  |
| <i>Lindera kariensis</i>      | 1  |
| <i>Lindera melissifolia</i>   | 11 |
| <i>Lindera obtusa</i>         | 9  |
| <i>Litsea aestivalis</i>      | 4  |
| <i>Litsea glauca</i>          | 1  |
| <i>Litsea novoleontis</i>     | 3  |
| <i>Litsea orizabae</i>        | 2  |
| <i>Litsea pallens</i>         | 2  |
| <i>Litsea parvifolia</i>      | 13 |
| <i>Litsea pedicellata</i>     | 4  |
| <i>Litsea schaffneri</i>      | 3  |
| <i>Malapoenna cuneata</i>     | 1  |
| <i>Malapoenna lamarensis</i>  | 1  |
| <i>Malapoenna weediana</i>    | 1  |
| <i>Mespilodaphne moschata</i> | 1  |
| <i>Misanteca capitata</i>     | 3  |
| <i>Misanteca peckii</i>       | 3  |

|                                    |    |
|------------------------------------|----|
| <i>Mocinnodaphne cinnamomoidea</i> | 1  |
| <i>Mutisiopersea liebmannii</i>    | 1  |
| <i>Nectandra chiapensis</i>        | 1  |
| <i>Nectandra colorata</i>          | 4  |
| <i>Nectandra glabrescens</i>       | 13 |
| <i>Nectandra heydeana</i>          | 6  |
| <i>Nectandra leucocome</i>         | 4  |
| <i>Nectandra matudai</i>           | 1  |
| <i>Nectandra perdubia</i>          | 10 |
| <i>Nectandra rubriflora</i>        | 7  |
| <i>Nectandra rudis</i>             | 6  |
| <i>Nectandra savannarum</i>        | 1  |
| <i>Nectandra sinuata</i>           | 12 |
| <i>Nectandra tabascensis</i>       | 2  |
| <i>Nectandra tonii</i>             | 1  |
| <i>Neolitsea lata</i>              | 2  |
| <i>Ocotea bernoulliana</i>         | 10 |
| <i>Ocotea campechiana</i>          | 1  |
| <i>Ocotea candidovillosa</i>       | 6  |
| <i>Ocotea chiapensis</i>           | 2  |
| <i>Ocotea congregata</i>           | 5  |
| <i>Ocotea corrugata</i>            | 2  |
| <i>Ocotea heribertoii</i>          | 1  |
| <i>Ocotea iridescens</i>           | 3  |
| <i>Ocotea lundellii</i>            | 3  |
| <i>Ocotea magnifolia</i>           | 6  |
| <i>Ocotea matudae</i>              | 3  |
| <i>Ocotea obtusifolia</i>          | 2  |
| <i>Ocotea ovandensis</i>           | 1  |
| <i>Ocotea parvula</i>              | 9  |
| <i>Ocotea platyphylla</i>          | 7  |
| <i>Ocotea pyramidata</i>           | 1  |
| <i>Ocotea salvinii</i>             | 4  |
| <i>Ocotea sarcodes</i>             | 4  |
| <i>Ocotea sauroderma</i>           | 3  |
| <i>Ocotea standleyi</i>            | 8  |
| <i>Ocotea subalata</i>             | 2  |
| <i>Ocotea tonii</i>                | 2  |
| <i>Ocotea truncata</i>             | 6  |
| <i>Oreodaphne benthamiana</i>      | 1  |
| <i>Oreodaphne sieberi</i>          | 1  |

|                                  |    |
|----------------------------------|----|
| <i>Persea albida</i>             | 8  |
| <i>Persea aurata</i>             | 3  |
| <i>Persea brevipetiolata</i>     | 2  |
| <i>Persea chamissonis</i>        | 10 |
| <i>Persea cinerascens</i>        | 6  |
| <i>Persea coriacea</i>           | 4  |
| <i>Persea domingensis</i>        | 2  |
| <i>Persea flavifolia</i>         | 4  |
| <i>Persea floccosa</i>           | 3  |
| <i>Persea humilis</i>            | 3  |
| <i>Persea liebmanni</i>          | 6  |
| <i>Persea matudae</i>            | 2  |
| <i>Persea obscura</i>            | 2  |
| <i>Persea pachypoda</i>          | 3  |
| <i>Persea parviflora</i>         | 1  |
| <i>Persea parvifolia</i>         | 7  |
| <i>Persea praelingue</i>         | 7  |
| <i>Persea pseudocarolinensis</i> | 11 |
| <i>Persea rufescens</i>          | 10 |
| <i>Persea standleyi</i>          | 4  |
| <i>Persea steyermarkii</i>       | 5  |
| <i>Persea veraguensis</i>        | 3  |
| <i>Perseanthus crossmanensis</i> | 1  |
| <i>Phoebe acuminatissima</i>     | 5  |
| <i>Phoebe amplexicaulis</i>      | 1  |
| <i>Phoebe angustata</i>          | 1  |
| <i>Phoebe arsenei</i>            | 2  |
| <i>Phoebe barbeyana</i>          | 1  |
| <i>Phoebe benthamiana</i>        | 1  |
| <i>Phoebe bourgeauviana</i>      | 6  |
| <i>Phoebe chinantecorum</i>      | 3  |
| <i>Phoebe effusa</i>             | 3  |
| <i>Phoebe ehrenbergii</i>        | 3  |
| <i>Phoebe gentlei</i>            | 6  |
| <i>Phoebe helicterifolia</i>     | 12 |
| <i>Phoebe longicaudata</i>       | 1  |
| <i>Phoebe obtusata</i>           | 1  |
| <i>Phoebe pachypoda</i>          | 5  |
| <i>Phoebe padiformis</i>         | 2  |
| <i>Phoebe pallescens</i>         | 3  |
| <i>Phoebe platyphylla</i>        | 1  |



|                                |   |
|--------------------------------|---|
| <i>Phoebe psychotrioides</i>   | 4 |
| <i>Phoebe salicifolia</i>      | 1 |
| <i>Phoebe salvinii</i>         | 2 |
| <i>Phoebe siltepecana</i>      | 1 |
| <i>Tetranthera glaucescens</i> | 2 |
| <i>Umbellularia parvifolia</i> | 1 |

#### **Euwallacea hosts from Akif et al. (2013)**

|                                       |      |
|---------------------------------------|------|
| <i>Acer buergerianum</i>              | 5    |
| <i>Acer macrophyllum</i>              | 920  |
| <i>Acer negundo</i>                   | 1106 |
| <i>Acer palmatum</i>                  | 19   |
| <i>Acer rubrum</i>                    | 308  |
| <i>Albizia julibrissin</i>            | 121  |
| <i>Alnus rhombifolia</i>              | 881  |
| <i>Beaucarnea recurvata</i>           | 35   |
| <i>Bocconia arborea</i>               | 187  |
| <i>Brahea armata</i>                  | 24   |
| <i>Bursera fagaroides</i>             | 12   |
| <i>Bursera hindsiana</i>              | 141  |
| <i>Calocedrus decurrens</i>           | 717  |
| <i>Carpinus caroliniana</i>           | 469  |
| <i>Carya illinoensis</i>              | 187  |
| <i>Casimiroa edulis</i>               | 205  |
| <i>Castanospermum australe</i>        | 2    |
| <i>Catalpa speciosa</i>               | 146  |
| <i>Cercidium floridum</i>             | 485  |
| <i>Cercidium sonora</i>               | 31   |
| <i>Chiranthodendron pentadactylon</i> | 44   |
| <i>Clethra macrophylla</i>            | 76   |
| <i>Corymbia ficifolia</i>             | 4    |
| <i>Ehretia austin-smithii</i>         | 3    |
| <i>Ehretia latifolia</i>              | 183  |
| <i>Erythrina coralloides</i>          | 51   |
| <i>Ficus maxima</i>                   | 460  |
| <i>Fouquieria macdougalii</i>         | 50   |
| <i>Fraxinus uhdei</i>                 | 229  |
| <i>Fraxinus velutina</i>              | 584  |
| <i>Garrya wrightii</i>                | 151  |
| <i>Handroanthus impetiginosus</i>     | 7    |
| <i>Hauya microcerata</i>              | 5    |

|                                   |      |
|-----------------------------------|------|
| <i>Heliocarpus donnellsmithii</i> | 198  |
| <i>Ilex cornuta</i>               | 17   |
| <i>Jatropha cinerea</i>           | 111  |
| <i>Lippia torresii</i>            | 21   |
| <i>Lippia umbellata</i>           | 200  |
| <i>Liquidambar styraciflua</i>    | 465  |
| <i>Liriodendron tulipifera</i>    | 272  |
| <i>Magnolia guatemalensis</i>     | 8    |
| <i>Montanoa guatemalensis</i>     | 53   |
| <i>Nyssa sylvatica</i>            | 240  |
| <i>Olmediella betschleriana</i>   | 35   |
| <i>Ostrya virginiana</i>          | 455  |
| <i>Parkinsonia aculeata</i>       | 364  |
| <i>Persea americana</i>           | 597  |
| <i>Pinus douglasiana</i>          | 55   |
| <i>Pithecellobium dulce</i>       | 507  |
| <i>Platanus mexicana</i>          | 119  |
| <i>Platanus occidentalis</i>      | 334  |
| <i>Platanus racemosa</i>          | 745  |
| <i>Platanus wrightii</i>          | 118  |
| <i>Populus fremontii</i>          | 1028 |
| <i>Populus trichocarpa</i>        | 607  |
| <i>Prosopis articulata</i>        | 62   |
| <i>Prunus caroliniana</i>         | 59   |
| <i>Pseudobombax ellipticum</i>    | 183  |
| <i>Quercus agrifolia</i>          | 1455 |
| <i>Quercus alba</i>               | 248  |
| <i>Quercus chrysolepis</i>        | 1662 |
| <i>Quercus emoryi</i>             | 190  |
| <i>Quercus engelmannii</i>        | 439  |
| <i>Quercus lobata</i>             | 760  |
| <i>Quercus macrocarpa</i>         | 247  |
| <i>Quercus mexicana</i>           | 132  |
| <i>Quercus robur</i>              | 2    |
| <i>Quercus salicifolia</i>        | 4    |
| <i>Quercus virginiana</i>         | 98   |
| <i>Ricinus communis</i>           | 757  |
| <i>Salix babylonica</i>           | 53   |
| <i>Salix gooddingii</i>           | 1079 |
| <i>Salix laevigata</i>            | 1278 |
| <i>Sambucus nigra</i>             | 1109 |

|                                 |      |
|---------------------------------|------|
| <i>Sequoia sempervirens</i>     | 618  |
| <i>Sophora secundiflora</i>     | 146  |
| <i>Tabebuia impetiginosa</i>    | 169  |
| <i>Taxodium mucronatum</i>      | 310  |
| <i>Thevetia thevetioides</i>    | 63   |
| <i>Tilia americana</i>          | 294  |
| <i>Ulmus alata</i>              | 125  |
| <i>Ulmus americana</i>          | 386  |
| <i>Umbellularia californica</i> | 1059 |
| <i>Ungnadia speciosa</i>        | 75   |
| <i>Washingtonia filifera</i>    | 95   |
| <i>Wisteria floribunda</i>      | 7    |

**Supplementary Table S2. Model evaluation from partial AUC after 500 bootstrapping simulations.**

| Model                                    | Number of testing points | Mean AUC ratio | <i>t</i> | df     | <i>P</i> -value |
|------------------------------------------|--------------------------|----------------|----------|--------|-----------------|
| <i>Xyleborus glabratus</i> (Bioclimatic) | 198                      | 1.735306       | 1069.7   | 524.38 | < 2.2e-16       |
| <i>Xyleborus glabratus</i> (NDVI)        | 198                      | 1.417213       | 214.64   | 678.62 | < 2.2e-16       |
| <i>Euwallacea</i> sp. (Bioclimatic)      | 423                      | 1.559872       | 319.7    | 589.32 | < 2.2e-16       |
| <i>Euwallacea</i> sp. (NDVI)             | 423                      | 1.970992       | 3607     | 500.27 | < 2.2e-16       |
| Hosts <i>Euwallacea</i> sp. (NDVI)       | 1251                     |                |          |        |                 |
| Lauraceae species (NDVI)                 | 2262                     | 1.625564       | 392.18   | 550.21 | < 2.2e-16       |
| <i>Xyleborus</i> species (NDVI)          | 517                      | 1.251977       | 23.296   | 794.12 | < 2.2e-16       |
